# Supplementary material for: Hospital Access Restrictions and Conditional Admission in Japanese Long-Term Care Facilities During COVID-19: A Nationwide Facility Survey of Outcomes
Source: Research Square preprint supplement (doi:10.21203/rs.3.rs-7824148/v1), 2025-11-20
Supplement: Supplementary file 1 [file 3704c37e52774189dca30141.xlsx]

## Sheet: coded
Q1. Night-time nursing coverage at your facility	Q2. Physician arrangement at your facility (select all that apply)	Q3. Before the pandemic (before February 2020), was end-of-life care feasible in your facility?	Q4. For residents with COVID-19, what medical care was feasible in-facility? (select all that apply)	Q5. Were outpatient visits for your facility’s residents uniformly refused by hospitals/clinics?	Q6. Were outpatient visits for febrile residents uniformly refused by hospitals/clinics?	Q7. Due to (suspected) COVID-19, was hospital admission ever difficult to obtain?	Q8. If admission was refused or restricted (COVID-19), what reasons were given? (select all that apply)	Q9. For conditions other than COVID-19 or fever (e.g., suspected stroke, fractures), was hospital admission ever difficult to obtain?	Q10. If admission was refused or restricted (non-COVID), what reasons were given? (select all that apply)	Q11. During the pandemic, how were outpatient/hospital admissions for febrile residents coordinated? (select all that apply)	Q12. When a resident with COVID-19 could not be admitted, what alternative measures were taken? (select all that apply)	Q13. Compared with community-dwelling older adults in the same area, how did you perceive hospital admission acceptance for LTCF residents?	Q14. When residents with COVID-19 wished to be admitted, did your facility experience admissions being granted only on the condition of forgoing ICU-level treatments or mechanical ventilation?	Q15. When residents with COVID-19 wished to be admitted, did your facility experience admissions being granted only on the condition of accepting DNAR (do-not-attempt-resuscitation)?	Q16. During pandemic-related outpatient visits/admissions, how were treatment preferences confirmed?	Q17. Among residents medically indicated for admission and who wished to be admitted but could not be admitted at that time: what were the subsequent outcomes? (select all that apply)	Q18. Prefecture of your facility
2	2	1	3, 5	2	2	1	2	2		1	5	1	2	2	1	1	Gunma
2	2	1	3, 4	1	1	1	2	1	2	1, 2	3, 4	2	3	2	1	1	Fukushima
2	3	1	1, 2, 3, 4, 7	1	1	1	1, 4, 7	1	6, 7	2	4	2	1	3	1	4	Okayama
2	3	2	2, 3	2	2	1	6	2		1	1	2	2	2	1	1	Hokkaido
2	3	1	1, 2, 3, 4, 5	2	2	1		2		1	1	1	2	2	1	1	Miyazaki
2	3	1	1, 3, 4, 5	2	2	1	2	2	2	1, 2	1	2	2	2	3	4	Saga
2	2	2	7	2	2	1	3	2		1, 2	5	1	3	3	3	1	Hokkaido
2	3	1	3, 5	2	2	1	2	2		1, 2	1, 4	1	2	2	1	2, 3	Osaka
2	3	2	1, 2, 3, 4	2	2	2		2		1	5	1	2	2	1	1	Tokushima
2	3	1	1, 2, 3	2	2	1	2, 6	1	2, 6	2	1, 3		2	2	1	1, 2	Hokkaido
1	3	1	1, 3, 4, 5	2	2	2		2		1	1, 3	1	2	2	3	1, 2	Hokkaido
2	3	2	1, 4	1	1	1	2, 5	1	2	2	1	2	3	1	1	1, 2, 3	Chiba
2	3	2	1, 2, 3, 7	2	2	1	2			1	1, 3	1	3	2	1	1, 2, 4	Okayama
2	3	1	5	2	2	1	7	2		3	4	1	2	2	1	1	Toyama
2	3	1	2, 3	2	2	2		2		1	1, 3	1	2	2	1	4	Tochigi
2	3		1, 3, 4, 5	2	2	1	2	2		1, 2	1, 3		2		1	1, 2, 3	Chiba
2	3	1	1, 2, 3, 4, 5	2	2	1		2		1, 2	1, 3, 4	1	3	3	1	1, 2	Aichi
2	3	1	1, 2, 3, 4, 5, 7	2	2	1	1, 2, 4, 5, 6, 7	1	1, 2, 4, 5, 7	1, 2	1, 3, 4	2	1	1	1	2	Fukuoka
2	2	2	5	1	1	1		2	2	1	1	2	2	2	3		Tochigi
2	3	1	1, 5	2	2	1	2	2		2	1	1	2	2	3	3	Kagawa
2	2	1	1, 2, 3, 4, 5	2	2	2		2		1	1	1	2	2	1		Kumamoto
2	3	2	2, 3	2	2	2		2		1	1	2	3	3	1	4	Hokkaido
2	3	1	1, 2, 3, 4, 5	2	1	1	2	1	2, 6	1, 2	1	2	2	2	1	1	Hyogo
2	3	1	1, 2, 3, 4	2	2	1	2	2		1, 2	1	1	2	2	1	1	Okinawa
2	1	1	1, 2, 3, 5	1	2	1	1, 2, 4, 5, 7	2		2	1, 4	2	1	1	1	1, 2	Aichi
2	1	1	1, 2, 3, 4, 5	1	1	1	7	1	2	3	1	3	2	2	4	1	Hiroshima
2	1	1	1, 2, 3, 4, 5	2	2	2		2		1, 2	5	2	2	2	1	4	Hiroshima
2	1	1	1, 2, 3, 4	2	2	2		2		1, 2	1, 5	1	2	2	1	1	Shizuoka
2	1	1	2, 3, 5	2	2	2		2		1, 2	1		3	3	1	1	Tochigi
2	1, 3	1	2, 3, 4, 5	1	2	2		1	2	1, 2	1	1	3	3	1	1, 2	Hokkaido
2	1, 3	1	3, 5	2	2	1	2, 7	1	2	1	1	1	2	2	1	1
2	3	2	1, 2, 3, 4	2	2	1	3	2		1	1, 3	2	2	2	1	2	Ehime
2	3	1	1, 3, 4, 5	2	2	1	2	2		1, 2	1		2	3	1	1, 3	Okayama
2	3	1	1, 3, 4, 7	2	2	2		2		1, 2	4	2	2	2	1	2	Okayama
2	3	2	1, 3, 4	2	2	1		1	1	1	1	2	2	2	1	4	Iwate
2	3	1	1, 2, 3, 5	2	2	2		2		1	1	1	2	2	1	1	Iwate
2	3	2	2, 3	2	2	1	2	1	2	1	1	1	2	2	1	2	Gifu
2	3	1	1, 2, 3, 4, 5	2	2	2		2		1	6		3	3	3	4	Miyazaki
2	3	1	1, 2, 3, 4, 5	1	2	1	2	2		1, 2	1	2	3	3	1	1, 2	Miyagi
2	3	2	3, 4	2	2	1	1, 2	2		1	1, 4	2	2	2	1	2	Miyagi
2	3	1	1, 2, 3, 4, 5	2	2	1	2	2		1	1	1	3	3	1	1	Gunma
2	3	1	1, 2, 3, 4, 5	2	2	1	2, 7	2		1, 2	1	2	2	2	1	1	Gunma
2	3	1	1, 2, 3, 4, 5	2	2	2		2		1	1	1	2	2	1	4	Hiroshima
2	3	1	1, 3, 5	2	2	1	2, 7	1	2, 7	1	1		3	3	1	4	Yamanashi
2	3	1	3	1	1	1		1		2	4	2	3	3	1	2	Yamanashi
2	3	1	3, 5	2	2	2		2		1	1, 5	1	2	2	1	4	Akita
2	3	1	3, 4	2	2	2		2		1	1	3	2	2	1	1	Akita
2	3	1	3, 4, 5	1	1	1	1	1	3	1	1, 3	2	2	2	3	1	Aomori
2	3	1	2, 3, 4, 5	2	2	1	2	1	2	1	1	2	2	2	1	2	Ishikawa
	3	2	2, 3		2	1	2, 7	2		1	1		2	2	1	1	Ishikawa
2	3	1	1, 3	2	2	2		2		1	1, 3	1	2	2	1	1	Chiba
2	3	1	3	2	2	2		2		1, 2	1, 3	1	2	2	1	1	Nara
2	3	1	1, 2, 3, 5	2	2	2		1	2	1	3	1	3	3	1	2	Hokkaido
2	3	1	3	2	2	1	2	1	2, 7	1, 2	1	2	2	2	1	1
2	3	1	2, 3, 5	2	2	1		1	2, 4	1	1	2	3	3	1	4	Ishikawa
2	3	1	1, 2, 3, 5	2	2	1	2	1	2	1	1	1	2	2	1	1, 2, 3	Kagoshima
2	3	1	2, 3, 5	2	2	2		2		1	1, 3	1	3	2	3	4	Shizuoka
2	3	1	3	2	2	2		2		1	3	1	2	2	1	4	Miyagi
2	3	1	2, 3, 5	2	2	2		1	2	1, 2	1	1	2	2	1	2	Ibaraki
2	3	1	5	1	1	1	2, 7	2		1	3	1	3	3	1	3	Miyazaki
2	3	1	3, 4	2	2	1	2	2		1	1		2	2	1	1	Fukui
2	1	1	1, 3, 5	2	2	1	2	1	2	1	4, 5	1	3	1	1	4	Tokyo
2	1	1	1, 3, 4, 5	1	1	1	4	1	6	1	1, 3	2	1	3	1	3	Fukuoka
2	1	1	2, 3	2	2	1	2, 4	2		2	1, 4	2	1	2	1	2	Wakayama
2	3	1	1, 2, 3, 5	2	2	1		1		1, 2	3	2	2	2	1	1	Aichi
2	3	1	1, 2, 3	2	2	2		2		1	1, 5	2	2	2	1	4	Kumamoto
2	3	1	1, 2, 3, 4	2	2	1	2, 5	2		2	4	2	1	1	1	4	Fukuoka
2	3	1	3, 4, 5	2	2	1	2, 7	1	7	1, 2	4	2	3	3	1	4	Aichi
2	3	1	1, 3, 4, 5	1	2	1	6	1	1	1	1, 4	2	2	3	1	1, 2, 3	Aichi
2	3	1	3, 4, 5	2	2	1	2	1	2	1, 2	1	2	3	2	1	1, 2, 3	Aichi
2	3	1	3	2	2	1	2	1	2	1, 2	1	1	2	2	1	1	Aichi
2	3	1	2, 3	2	2	1	6	1	2	2	3	1	2	2	1	3	Aichi
2	3	2	3	2	2	1	2, 7	1	2, 7	1, 2	1, 4	2	3	3	1	2, 3	Aichi
2	3	1	3, 5	2	1	1	1, 2	2		1, 2	1, 4	2	3	1	1	2	Aichi
2	3	1	1, 3, 4, 5	2	2	1	2	2		2	1	1	2	2	1	2	Aichi
2	3	1	3, 5	2	2	1	2	2		1	1	1	2	2	1	1	Aichi
2	3	1	3	2	2	1	2	2		1, 2	1		3	3	3	1, 2	Aichi
2	3	1	3, 5	2	2	2		2		1	5		2	2	1	2, 3	Aichi
2	3	1	1, 3, 4, 5	2	2	1	2	1	2	1	1		3	3	1	1	Ehime
2	3	1	1, 2, 3	2	2	1	2	1	2	1, 2	1	1	2	2	3	1	Ehime
2	3	1	1, 2, 3, 4	2	2	2		2		1, 2	1	1	3	3	3	4	Ehime
2	3	1	1, 2, 3, 4, 5	2	2	2		2		1	1	2	3	3	1	2	Ehime
2	3	1	1, 2, 3, 4, 5	2	2	2		2		1	1	1	2	2	1	1	Ehime
2	3	1	1, 2, 3, 4, 5	1	1	1	2, 5	1	2	1, 2	1, 4	2	1	1	1	1, 2	Ibaraki
2	3	1	3	2	2	1	1, 2, 4	1	2, 7	2	4	1	3	2	3	2, 3	Ibaraki
2	3	1	1, 2, 3, 4, 5	2	2	1	2, 4, 5, 7	1	2, 4, 5, 7	1, 2	1	2	1	1	1	3	Ibaraki
2	3	1	3, 4, 5	1	1	1	1, 2, 6	1	2, 6, 7	1, 2	1, 4	2	3	3	1	1, 2, 3	Ibaraki
	3	2	1, 2, 3, 4	1	1	1	2, 4	1	2, 4, 6	1, 5	1, 4	2	2	2	1	2, 3	Ibaraki
2	3	1	1, 2, 3, 5	2	2	1	2	2		2	1	1	2	2	1	1	Ibaraki
2	3	1	1, 2, 3, 4, 5	2	2	1	2, 5	2		1, 2	1	2	1	2	1	2	Ibaraki
2	3	1	1, 2, 3, 4, 5	2	2	1	2, 5	2		2	1	1	2	1	1	4	Ibaraki
2	3	1	2, 3	2	2	1	2, 6	2		1	1	2	2	2	1	4	Ibaraki
2	3	1	1, 2, 3, 4, 5	2	2	1	6	2		1	1	2	2	2	1	1	Ibaraki
2	3	1	3	2	2	2		2		1	1	1	2	3	1	4	Ibaraki
2	3	1	2, 3, 4, 5	1	1	1		1		2	3, 4	2	3	3	1	2	Ibaraki
2	3	1	1, 2, 3, 4, 5	2	2	2		2		1	5	1	3	3	1	4	Ibaraki
2	3	1	7	1	1	1	2, 7	1	1, 2	1		1	3	3	1	1	Okayama
2	3	1	1, 2, 3, 4, 5	1	1	1	1, 2, 7	1	1, 2, 7	2	1, 4	2	3	3	1	3	Okayama
2	3	1	2, 3, 4, 5	2	2	1	2	1	2	1	1, 3		3	3	1	1	Okayama
2	3	1	1, 3, 4, 5	2	2	1	2, 5	1	2	1, 2	1	1	2	1	1	1	Okayama
2	3	1	3, 5	2	2	1	2, 7		2, 7	1	1	2	2	2	1	1	Okayama
2	3	1	1, 2, 3, 5	1	1	1	5	2		1, 2	1	2	2	2	1	1	Okayama
2	3	1	2, 3	2	2	1	2	2		1	1	1	2	3	1	1	Okayama
2	3	2	1, 3, 4	2	2	1	2	2		1, 2	1	1	2	2	1	2	Okayama
2	3	1	1, 2, 3, 4, 5	2	2	1	2			1	1	1	2		1	1	Okayama
1	3	1	1, 2, 3	2	2	1	2, 6	2		1, 2	1, 4	1	3	3	1	1	Okayama
2	3	2	1, 2, 3, 4	1	2	1	7	2		1	3	3	2	2	1	1	Okayama
2	3	1	1, 2, 3, 5	2	2	2		2		1	5	1	3	2	1	1	Okayama
2	3	1	1, 2, 3, 4, 5	2	2	1		2		1	1	2	2	2	1	1	Okayama
2	3	2	1, 2, 3, 4	1	1	1	2, 7	1	2, 7	1, 2	1	2	3	3	1	2	Okinawa
2	3	1	2, 3, 5	2	2	2		2		1	1	1	2	2	1	1	Okinawa
2	3	1	2, 3, 4	2	2	1	1, 2	2		1, 2	1, 4	2	2	2	1	1	Iwate
2	3	1	3	2	2	1	1, 2	2		1	1	1	2	2	1	1	Iwate
2	3	2	1, 2, 3, 4	2	2	1		2		1	3	2	2	2	1	4	Iwate
2	3	1	1, 2, 3	2	2	2		2		1	5	1	3	3	1	4	Iwate
	3	1	3, 5	2	2	2		2		1	3	1	2	2	1	4	Iwate
2	3	1	7	1	1	1	2, 7	1	6, 7	1	3	2	2	2	1	1, 2	Gifu
2	3	1	7	1	2	1	4, 5	1	4, 5	1, 2	4		1	1	1	2	Gifu
2	3	1	3, 4	2	2	1	2	1	2	1			3	3	1	2	Gifu
2	3	1	3, 4, 5	2	2	1	2	1	2	1, 2	1, 4	2	3	2	3	1, 3	Gifu
2	3	1	3, 4, 5	2	2	1	2	1	2	1	1, 3	1	2	2	1	1	Gifu
2	3	1	1, 3, 5	2	2	1	2	2		1	1	2	2	2	1	1	Gifu
2	3	1	2, 3	2	2	1	6	2		1, 2	1		2	3	1	4	Gifu
2	3	1	7	2	2	1	7	2		1	4	1	2	2	1	1	Gifu
2	3	1	1, 2, 3, 4, 5	2	2	2		2		2	1	1	3	3	3	4	Gifu
2	3	1	1, 3, 4, 5	2	2	2		2		2	1, 3	1	3	2	3	2	Gifu
2	3	1	2, 3, 4, 5	2	2	2		2		1, 2	1	1	2	2	1	1	Gifu
2	3	1	7	2	2	2		2		1	5		3	3	1	4	Gifu
2	3	1	1, 2, 3, 4, 5	2	2	2		2		5	1	1	3	3	1	1, 4	Gifu
2	3	2	3	2	2	2		2		1, 2	5	1	3	3	1	4	Gifu
2	3	1	1, 2, 3, 4, 5	1	1	1	1, 2, 5	2		1	1		2	1	1	3	Miyazaki
2	3	1	2, 3, 5	2	2	1	1	2		1	1	2	3	3	3	1	Miyazaki
2	3	1		2	2	2		2		1		1					Miyazaki
2	3	1	1, 2, 3, 5	1	1	1	2	1	2	5	1	2	2	2	1	1	Miyagi
1	3	1	1, 2, 3, 4, 5, 7	2	1	1	2	1	2	1	1		3	2	1	1	Miyagi
2	3	2	3	2	2	2		2	2	1	1	1	2	2	1	1	Miyagi
2	3	1	1, 5	1	1	1	2, 6	1	2, 6	1	4		3	3	1	3	Miyagi
2	3	1	3, 4, 5	2	2	1	2, 6	1	2, 6	1	1	2	2	2	3	1	Miyagi
2	3	1	1, 2, 3, 4	2	2	1	2	1	2, 7	1, 2	1, 4	2	2	2	1	2, 3	Miyagi
2	3	1	1, 2, 3, 4	2	1	1	2	2		1, 2	1	1	2	2	1	1, 2	Miyagi
2	3	1	1, 3, 4, 5	2	2	1	2	2		1	1	2	3	3	1	2	Miyagi
3	3	2	3, 4	2	2	1	7	2		1, 2	1	2	2	2	1	4	Miyagi
2	3	1	2, 5	2	2	2		2		1	1	2	2	2	1	1, 3	Miyagi
2	3	1	1, 2, 3, 5	2	2	1	2	1	2	1, 2	1	1	2	2	1	1	Kyoto
2	3	1	1, 3	2	2	1	2	2		1	4	1	2	2	3	1	Kyoto
2	3	1	2, 3, 5	2	2	1	7	2		2	1	2	2	2	1	4	Kyoto
2	3	1	1, 2, 3, 4	2	2	2		1	7	1, 2	1	1	2	2	1	1	Kumamoto
2	3	1	1, 2, 3	2	2	1	1, 2	1	2	1, 2	1	1	2	2	1	1	Kumamoto
2	3	1	2, 3	2	2	1	2	1	2	1	4	1	2	2	1	2	Kumamoto
2	3	1	1, 2, 3, 4	2	2	1	2	2		1	1	2	2	2	1	1	Kumamoto
2	3	1	1, 3, 4	2	2	1	6	2		2	4		3	2	1	3	Kumamoto
2	3	1	1, 2, 3	2	2	2		2		2	5	1	2	2	1	4	Kumamoto
2	3	1	1, 2, 3, 4, 5	2	2	2		2		1	1	1	2	2	3	1, 2	Kumamoto
2	3	2	1, 2, 3	2	2	2		2		1	1	1	2	2	1	4	Kumamoto
2	3	1	1, 2, 3, 5	2	1	2		2		1, 2	1	2	3	1	1	1	Kumamoto
2	3	1	1, 2, 3, 4, 5	2	2	2		2		1	1	1	2	2	1	1	Kumamoto
2	3	1	2, 3, 5	2	2	1	1, 2, 6	1	2	1, 5	1	2	1	1	1	2, 3	Gunma
2	3	1	7	2	2	1	2	1	2	1	1	2	3	3	3	4	Gunma
2	3	1	4, 5	2	2	2		2		1, 2	5	1	3	3	4	2	Gunma
2	3	1	2, 3, 4	2	2	2		2		1	1, 3	2	2	2	1	2	Gunma
2	3	1	1, 2, 3	2	1	1		2		1	4		3	3	1	1	Gunma
2	3	1	1, 3, 4, 5	2	1	1	5, 6	1	1, 2	1, 2	1, 4	2	1	1	1	1	Hiroshima
2	3	1	1, 2, 3, 4, 5	2	2	1	2	1	2	1	1, 3	2	3	3	1	2, 3	Hiroshima
2	3	1	2, 3, 4	2	2	1	2	1	2	1, 2	1	2	3	2	1	1, 2	Hiroshima
2	3		1, 2, 3	2	2	1	2	1	2	1, 2	1	1	2		1	1	Hiroshima
2	3	1	1, 2, 3, 4, 5	2	2	1	2	1	2	1, 2	1	2	2	2	1	2	Hiroshima
2	3	1	1, 3, 5	2	2	1	2	1	2	1	1		2	3	1	1	Hiroshima
2	3	1	1, 2, 3, 4, 5	2	1	1	1, 7	2		1, 2	1	2	2	2		1	Hiroshima
3	3	1	1, 2, 3, 5	2	1	1	1, 2	2		1	1	2	3	3	1	1	Hiroshima
2	3	1	1, 2, 3, 5	2	2	1	2	2		5	1	2	2	2	1	1	Hiroshima
2	3	1	1, 2, 3, 4, 5	2	2	1	2	2		1	1		2	2	3	1	Hiroshima
2	3	1	2, 3	1	1	1	2, 7	2		1	1, 4		2	2	1	1, 2	Hiroshima
2	3	1	2, 3, 4, 5	2	2	2		2		1	1	1	2	2	1	1	Hiroshima
2	3	1	3	2	2	2		2		1	1		3	3	1	1	Hiroshima
2	3	1	1, 2, 3, 4	2	2	1		1		1	1, 3	2	2	2	1	1, 2, 3	Hiroshima
2	3	1	1, 2, 3	2	2	2		2		1	1	1	2	2	1	1	Hiroshima
2	3	1	1, 2, 3, 4, 5	2	2	1		2		2	1				1	2	Hiroshima
2	3	1	1, 2, 3	2	2	2		2		1	5		2	2	1		Hiroshima
2	3	1	1, 2, 3, 4, 5	2	2	2		2		1	1	1	2	2	1	4	Hiroshima
2	3	1	1, 2, 3, 4, 5	2	2	2		2		1	1	1	2	2	1	4	Hiroshima
2	3	1	3, 4, 5	2	2	1	2	1	2, 5	1	1		2	2	1	1	Kagawa
2	3	1	3, 4, 5	2	2	1	3	2		1	1	2	3	3	1	4	Kagawa
2	3	1	1, 2, 3, 4, 5	2	2	1	1	2		1	1	2	2	2	1	1	Kagawa
2	3	1	1, 2, 3, 4, 5	2	2	1	2	2		1	1	1	2	2	1	1	Kagawa
2	3	2	1, 2, 3	2	2	1	2	2		1	3	1	2	2	1	1	Kagawa
2	3	1	1, 2, 3, 4, 5	2	2	1		1		1	1	2	3	3	1	4	Kagawa
2	3	2	3	2	2	1	1, 2, 6	1	1, 2	1, 2	1	2	3	3	3	1	Kochi
2	3	1	1, 2, 3, 4, 5	1	1	1	1	2		5	3		2	2	1	1, 4	Kochi
2	3	1	1, 2, 3, 5	2	2	2		2		1	1		3	3	1	4	Kochi
1	3	1	7	2	2	2		2		2	5	2	3	3	1	2	Saga
2	3	2	3	2	1	1	2	1	2	1	1	1	3	2	1	2	Saitama
2	3		3, 4, 5	2	2	1	2		2	1	1	1	2	2	1	3	Mie
2	3	1	3, 4	2	2	1	2	1	2	1, 2	1	2	3	2	1	1, 2	Mie
2	3	1	1, 2, 3, 4, 5	2	2	1	2	2		1	1, 6	1	3	3	1	4	Mie
2	3	1	1, 2, 3	1	2	1	2	2		1	4	1	2	2	1	2	Mie
2	3	1	3, 5	2	2	2		2		1, 2	1	1	2	2	1	4	Mie
2	3	1	2, 3, 7	2	2	2		2		1, 5	5	1	2	2	1	1, 2	Mie
2	3	1	3, 5	2	2	2		2		1	1	1	2	2	1	4	Mie
2	3	1	3, 5	2	2	2		2		1	1	1	3	3	1	1	Mie
2	3	1	2, 3, 4, 5	2	2	1	2	1	1, 2	1	1	2	2	2	3	1	Yamagata
2	3	1	1, 2, 3, 4, 5	2	1	1	2	1	7	2	1	2	2	2	1	2	Yamagata
2	3	1	1, 2, 3, 4, 5	2	2	1	2	2		1	1	2	3	3	1	1	Yamagata
2	3	1	2, 3, 5	2	2	2		2		1, 2	1, 3	1	3	3	1	1	Yamagata
2	3	1	1, 2, 3, 4, 5	2	2	2		2		2	1	2	3	2	1	1	Yamagata
2	3	1	2, 3	2	2	2		2		4	6			3	4	4	Yamagata
2	3	1	2, 3, 5	2	2	2		2		1		1	2	2	1	4	Yamagata
2	3	1	2	2	2	2		2		1	5	1	2	2	1	1	Yamagata
2	3	1	2, 3, 5	1	2	1	2, 7	2	2	1	3	2	2	2	1	2	Yamaguchi
2	3	1	1, 2, 3, 7	1	1	1	2, 7	1	2, 7	1	1		3	3	1	2	Yamaguchi
2	3	1	2, 3, 5	2	2	1	2	2		1	3	1	2	2	1	1, 2	Yamaguchi
2	3	1	2, 3, 4, 5	1	1	1	2	2		1	1, 3	2	2	2	4	4	Yamaguchi
2	3	1	1, 2, 3, 4, 5	2	2	1	2, 7	2		1, 2	1		2	3	1	1	Yamaguchi
2	3	1	1, 2, 3, 4	2	2	1	2	1	2	2	1	2	2	2	1	2	Yamanashi
2	3	1	2, 3	2	1	1	1, 2	2		1	1	2	2	1	1	2	Yamanashi
2	3	1	3, 5	2	2	1	2	2		1	3	1	2	2	1	1	Yamanashi
2	3	1	2, 3, 4, 5	2	2	1	2	2			1		1	1	1	4	Yamanashi
2	3	1	1, 2, 3, 4, 5	2	2	2		2		1	1	1	3	3	1	4	Yamanashi
2	3	1	1, 2, 3, 4, 5	2	2	2		2		1	5	1	2	2	1	1, 3	Yamanashi
2	3	1	1, 2, 3, 4, 5	2	2	2		2		1	1		3	3	3	1	Yamanashi
2	3	1	1, 2, 3	2	2	1	2	1	2	1	1		3	3	1	4	Kagoshima
2	3	1	3	1	1	1	2, 6	1	2, 6	1	1	2	3	3	1	1	Kagoshima
2	3	2	1, 2, 3, 4	2	2	1	2	1	2	1	3		2	2	1	1	Kagoshima
2	3	2	2, 3, 4	1	1	1	2	2		1, 2	1	2	2	2	3	1	Kagoshima
2	3	1	1, 2, 3, 4, 5	2	2	1	2	2		1, 2	1	2	3	3	1	2, 3	Kagoshima
2	3	1	1, 2, 3, 4, 5	2	2	1	2, 6	2		1	1	2	3	2	3	1, 3	Kagoshima
2	3	1	1, 2, 3, 4	2	2	1	6	2		1, 2	1	1	2	2	1	1	Kagoshima
2	3	2	1, 2, 3, 4	2	2	2		2		1	1		2	2	3	1	Kagoshima
2	3	1	7	2	2	2		2		1	5	1	3	3	1	4	Kagoshima
2	3	1	1, 2, 3, 4	2	2	2		2		1	1	1	3	3	3	4	Kagoshima
2	3	1	1, 2, 3, 5	1	1	1	1, 2	2	6	1, 3	1, 3	2	2	2	1	1	Akita
2	3	1	3, 5	2	2	2		1	1, 6	1	1	2	2	2	3	3	Akita
2	3	2	2, 3, 4	2	2	1	2	2		2	1	2	3	2	1	1	Akita
2	3	1	3	2	2	1		2		1	1, 3	1	2	2	1	1	Akita
2	3	2	1, 2, 3	1	2	2		2		1, 2	1	1	2	2	1	4	Akita
2	3	1	1, 2, 3, 4, 5	2	2	2		2		1	1	1	2	2	1	1	Akita
2	3	1	3	2	2	2		2		1	1, 5	1	2	2	1	2	Akita
2	3	1	1, 2, 3, 4, 5	2	2	2		2		1	1	2	2	2	1	1	Akita
2	3	1	2, 3, 5	2	2	2		1	2	1	6	2	2	2	3	1	Niigata
2	3	1	3, 4, 5	2	2	1	2, 7	2		1	1	2	2	2	3	1	Niigata
2	3	1	1, 2, 3, 4, 5	2	2	1	1, 2	2		1, 2	1		3	3	1	2	Niigata
2	3	1	1, 2, 3, 4, 5	2	2	2		2		5	1, 6		2	2	1	4	Niigata
2	3	1	2, 3, 5	2	2	2		2		1		2	3	2	1	1	Niigata
2	3	1	7	2	2	2		2		1, 2	5	1	2	2	3	4	Niigata
2	3	2	1, 3	2	2	2		2		2	1, 5		2	2	3	2	Niigata
2	3	1	2, 3, 5	2	2	2		2		5	5	1	2	2	1	4	Niigata
2	3	1	1, 2, 3, 4, 5	2	2	2		2		1, 2	1	1	2	2	1	1, 2, 3	Niigata
2	3	1	5, 7	2	2	1	2	1	2	1	3	2	2	3	1	1	Kanagawa
2	3	1	1, 3, 4, 5	2	2	2		2	2	5	1	1	3	3	1	2	Kanagawa
2	3	1	3, 4, 5	2	2	1	2, 5, 7	1	2, 5	1, 2	1, 3		3	3	3	2	Kanagawa
2	3	2	3	1	1	1	1, 2	1	2, 7	1	1	2	2	2	1	1	Kanagawa
2	3	1	3, 5	2	2	1	2, 7	1	2, 7	1	1, 3	1	2	2	1	4	Kanagawa
2	3	1	5	1	1	1	2, 5	1	2	1	1	1	1	1	3	2	Kanagawa
2	3	1	1, 3, 5	1	1	1	1, 2	2		1	1, 4	2	2	3	1	2, 3	Kanagawa
2	3	1	7	1	1	1	2	2		1	1		2	2	1	1, 2	Kanagawa
2	3	1	1, 2, 3	2	2	1	2	2		1	1	1	2	2	1	1	Kanagawa
2	3	1	3, 5	2	2	2		2		1	4		2	3	1	1	Kanagawa
2	3	1	2, 3, 5	2	2	1		1		4	1	2	3	3	1	1	Kanagawa
1	3	1	1, 2, 3, 4, 5	2	1	1	1, 2, 7	1	1, 2, 7	2	1	2	2	2	1	1, 2	Aomori
2	3	1	1, 2, 4	2	2	1	2, 4	1	2, 4	1, 2	1	2	2	2	1	2	Aomori
2	3	1	1, 3, 4, 7	2	2	1	2	2		1	3		2	2	3	1	Aomori
2	3	1	1, 2, 3, 4, 5	2	2	2		2		1, 2	1, 3		2	2	1	1, 2	Aomori
2	3	1	1, 2, 3, 4, 5	2	1	2		2		1	1	2	3	3	1	4	Aomori
2	3	1	1, 2, 3	2	2	2		2		1	1	1	2	3	3	1	Aomori
2	3	1	1, 2, 3, 4, 5	2	2	1	2	1	7	1, 2	5		2	3	1	4	Shizuoka
2	3	1	3	2	2	1	2	2		1	1, 4	2	2	2	1	1, 2	Shizuoka
2	3	1	1, 5	2	1	1	2			5	1		2	2	3	3	Shizuoka
2	3	1	1, 2, 3, 4, 5	2	2	1	2, 7	2		1	1	1	2	2	1	4	Shizuoka
2	3	1	1, 3, 4, 5	2	2	2		2		1	3		3	3	1	4	Shizuoka
2	3	1	5	2	2	2		2		2	5	1	3	3	1	4	Shizuoka
2	3	2	3	2	2	2		2		1	1	1	2	2	1	1	Shizuoka
2	3	2	1, 2, 3, 4	2	2	2		2		1, 2	5	3	2	2	1	4	Shizuoka
2	3	1	1, 2, 3, 5	2	2	2		2		1, 2	1	2	2	2	1	1	Shizuoka
2	3	1	1, 2, 3, 4, 5	2	2	2		2		1	1, 4	2	2	2	1	4	Shizuoka
2	3	1	1, 2, 3, 5	2	2	2		2		1	1, 5	1	2	3	1	4	Shizuoka
2	3	1	3	2	2	2		1	2	1	5	3	2	2	1	2	Ishikawa
2	3	1	1, 2, 3, 4, 5	2	2	2				1	1	1	3	3	3	4	Ishikawa
2	3	1	5, 7	2	2	2		2		5		1	3	3	4	4	Ishikawa
2	3	1	3	2	2	2		2		2	1	1	2	2	3	1	Ishikawa
1	3	1	1, 3, 5	2	2	2		2		1	1	1	3	2	1	1	Ishikawa
2	3	1	1, 2, 3, 4, 5	2	2	2		2		1, 5	1		3	3	1	1, 2, 3, 4	Ishikawa
2	3	1	2, 3, 4	2	2	2		2		1, 2	1	1	3	3	3	1	Ishikawa
2	3	1	5, 7	1	1	1	2, 7	1	3	1	1, 4	1	2	2	1	4	Chiba
2	3	1	2	2	2	1	2, 7	1	6, 7	2	1	2	3	3	1	1	Chiba
2	3	1	2, 3	2	2	1	2	1	2	1	1	1	2	2	1	1	Chiba
2	3	1	1, 2, 3	2	2	2		1	2, 5	1, 2	5	1	1	1	1	4	Chiba
2	3	1	3	2	2	1	2	2		2	3	2	1	1	1	1	Chiba
2	3	2	1, 2, 3	2	2	1	2	2		1, 2	1, 2	2	2	2	1	2	Chiba
2	3	2	1, 3, 4	2	1	1	2, 4	2		2	5	2	1	1	1	2	Chiba
2	3	2	1, 2, 3	2	2	2		2		1	5	1	2	2	3	4	Chiba
2	3	1	1, 2, 3, 4, 5	2	2	1	2	1	3	1	1		3	2	1	4	Osaka
2	3	1	1, 3	2	2	2	2	1	2	1, 2	1		2	2	1	4	Osaka
2	3	1	1, 3	2	2	1	2, 7	1	2, 7	1	1	1	2	2	1	1	Osaka
2	3	1	3, 4, 5	2	2	2		1	2, 7	1, 2	4		3	3	1	1, 2	Osaka
2	3	1	1, 2, 3, 4	2	2	1	2, 4, 5	1	2, 4, 5	2	1	1	2	2	1	1, 2	Osaka
2	3	1	1, 2, 3, 4, 5	1	1	1	2	2		1	1, 3	1	2	2	1	1	Osaka
2	3	1	3	2	2	2		2		1	1	1	3	3	1	1	Osaka
2	3	1	1, 2, 3, 4, 5	1	1	1	6	1	6	1	1	2	3	2	1	4	Oita
2	3	1	1, 3, 4, 5	1	1	1	2, 7	2		1	1, 4	1	2	2	1	1	Oita
2	3	1	3, 4	2	2	2		1	2	5	1, 3	1	2	2	1	1	Nagasaki
2	3	1	3, 4	2	2	1	2, 7	2		1	1	1	2	2	1	2	Nagasaki
2	3	1	3	2	2	2		2		1	1	1	2	2	1	1	Nagasaki
2	3	1	2, 3	2	2	2		2		1	1		2	2	1	1	Nagasaki
2	3	2	3, 7	2	2	2		2		1, 2			3	2	1	4	Nagasaki
2	3	1	3, 5	2	2	1	2, 7	1	2	1	3	2	2	2	1	1	Nagano
2	3	1	1, 3, 5	2	2	2		2		1	1	1	2	2	1	4	Nagano
2	3	1	1, 2, 3, 4, 5	2	2	1	2, 7	1	2, 6	1, 2	1	1	2	2	1	2	Tottori
2	3	1	3	2	2	2		2		1, 3, 5	6		2	3	4	4	Tottori
2	3	1	3	2	2	1	7	1	2	1	4		2	2	1	1	Shimane
2	3	1	2, 3, 4, 5	2	1	1	6	1	6	2	5		3	2	1	4	Shimane
2	3	1	1, 2, 3, 4, 5	2	2	2		2		1, 2	1	2	2	2	1	1	Shimane
2	3	1	3	1	1	1		2		1	3	1	3	3	1	4	Shimane
2	3	1	2, 3, 4, 5	2	2	2		2		2, 5	1	1	3	3	3	4	Shimane
2	3	1	1, 2, 3	2	2	2		2		3, 5	1	2	2	2	1	4	Shimane
2	3	1	5	2	2	2		2		1	1	1	3	3	3	1	Shimane
2	3	1	3, 5	2	2	2		2		5	1	1	3	3	3	1	Shimane
2	3	1	1, 2, 3, 4, 5	2	2	2		2		5	1	1	3	3	1	4	Shimane
2	3	1	5	2	2	2		2		4	1		2	2	1	4	Shimane
2	3	1	2, 3, 5	2	2	1	2	1	2	1, 2	1	2	2	2	1	1, 2	Tokyo
1	3	1	1, 3, 5	2	2	1	2, 5	1	2	1, 2	1	1	3	3	1	1, 2	Tokyo
2	3	1	3, 5	2	2	1	2, 5, 7	1	2, 7	1, 2	1	1	1	1	1	2	Tokyo
2	3	2	3	2	2	1	2	2		1	1		3	3	1	1	Tokyo
2	3	1	1, 3, 5	2	2	1	2	2		1, 2	1	1	2	2	1	1	Tokyo
2	3	1	5, 7	2	2	1	2	2		1, 2	1, 3	1	3	2	1	2	Tokyo
2	3	1	5	2	2	1	2, 7	2		1, 2	1		2	2	3	1	Tokyo
2	3	1	1, 2, 3, 5	2	1	1	2, 5, 7	2		2	1		3	2	1	4	Tokyo
2	3	1	1, 5	2	1	1	2, 4, 6, 7	2		1, 2	1	2	3	3	1	1, 2, 3	Tokyo
2	3	1	1, 2, 3, 5	2	2	1	2	2		1	1		2	2	1	1	Tokushima
2	3	2	1, 2, 3	2	2	1	2	1	2	1	1, 3	1	3	3	1	1, 2	Tochigi
1	3	1	2, 3, 4, 5	2	2	1	2	1	2	1, 2	4		2	2	1	2	Tochigi
2	3	1	1, 3, 4, 5	2	2	1	2	1	2	1, 2	1	2	2	2	1	2	Tochigi
2	3	1	2, 3, 4, 5	2	2	2		2		1	4		2	2	1	1	Tochigi
2	3	1	2, 3, 5	2	2	2		2		5	1	1	2	2	1	4	Tochigi
2	3	1	3, 4, 5	2	2	2		2		3	1, 5	1	2	2	1	4	Tochigi
2	3	1	3	2	2	1	2, 5	1	2	2	1		2	2	1	1	Nara
2	3	1	2, 3	2	1	1	2, 6	1	2	1	1, 4	2	2	3	1	1	Nara
2	3	1	1, 3, 4, 5	2	2	1	3	2		1	1	1	2	2	1	1	Nara
2	3	1	2, 3, 4, 5	2	2	2		2		1, 2	1, 4	2	2	3	1	1, 2	Nara
2	3	1	3, 4, 5	2	2	1	7	2		1	3	1	2	2	4	1, 2, 3	Toyama
2	3	1	1, 3, 4	2	2	2		2		1	3, 5	3	3	3	1	1	Toyama
2	3	1	3, 4, 5	2	2	1	2	2	2	1, 2	6	1	2	2	1	4	Fukui
2	3	2	2, 3, 4	2	2	1		1	2	1		3	2	2	1		Fukui
2	3	1	1, 2, 3, 4, 5	2	2	1	2	2		1, 2	1	1	3	3	1	1	Fukui
2	3	2	7	2	2	2		2		1	1		3	3	3	4	Fukui
2	3	1	1, 2, 3, 4, 5	2	2	1		1		1, 2	4		3	3	1	1	Fukui
2	3	1	1, 3, 4, 5	1	1	1	1, 2, 4	1	2	1, 2	4	2	3	3	3	4	Fukuoka
2	3	2	1, 2, 3	2	2	1	2	1	2	1, 2	5	1	2	2	1	2	Fukuoka
2	3	1	1, 2, 3, 4, 5	2	1	1	2, 5	1	2, 5, 6, 7	1, 2	1	2	2	1	1	3	Fukuoka
2	3		1, 3, 4	2	2	1	2	2		1	1	1	3	3	3	2	Fukuoka
2	3	1	1, 2, 3, 4, 5	2	2	1	2	2		1	4		3	3	3	4	Fukuoka
2	3	1	1, 2, 3, 4, 5	2	2	1	2, 4	2		1, 2	1		3	2	1	1	Fukuoka
2	3	2	1, 2, 3	1	1	1	2, 6	1		2	4	2	2	2	1	1, 2	Fukuoka
2	3	1	1, 3, 7	2	2	2		2		1	5	1	3	2	1	1, 2	Fukuoka
2	3	2	3	2	1	1	1, 2, 6	1	1, 4	1	4	2	2	2	1	1, 4	Fukushima
2	3	1	2, 3, 4, 5	2	2	1	1, 2	2		1, 2	1	2	3	2	1	1, 2	Fukushima
2	3	1	3	2	2	1	1, 2	2		1, 2	1	1	2	2	3	1	Fukushima
2	3	2	1, 2, 3	2	2	1	2	2		1, 2	1	1	2	2	1	4	Fukushima
2	3	1	2, 3	1	2	1	2	2		1, 2	1, 3	2	3	2	1	2	Fukushima
2	3	1	1, 2, 3, 4	2	2	2		2		1	5	1	2	3	1		Fukushima
2	3	1	1, 2, 3, 5	2	2	2		2		1, 2	1	1	3	3	1	1	Fukushima
2	3	2	1, 4	2	2	2		2		1	4		3	3	3	4	Fukushima
2	3	1	7	1	1	1	4, 6	1	2	1	1	1	2	1	1	2	Hyogo
2	3	1	1, 2, 3, 5	2	2	1	1, 2	1	2	1, 2	4	1	3	2	1	1	Hyogo
2	3	2	1	2	2	1	2	1	2	1	1		2	2	1		Hyogo
2	3	1	1, 2, 3, 4, 5	2	2	1	2	1	2	1, 2	1	1	3	2	1	1	Hyogo
2	3	1	1, 3, 5	2	2	1	2, 7	1	2	1, 2	1		3	3	1	1	Hyogo
2	3	1	5	2	2	1	2	1	2, 7	2	1	2	2	2	1	2	Hyogo
2	3	1	3, 4	2	1	1	2, 7	1	2, 7	1, 2	1		3	2	1	1	Hyogo
2	3	1	1, 2, 3, 5	2	2	1	2	2		1, 2	1	2	2	2	1	2, 3	Hyogo
2	3	1	1, 2, 3, 4, 5	2	1	1	2	2		5	1		2	2	1	1	Hyogo
3	3	1	1, 2, 3, 4, 5	1	1	1	2	2		1, 2	1	2	2	2	1	2	Hyogo
2	3	1	3, 5	2	2	1	2	2		1, 2	1	1	2	2	1	2	Hyogo
2	3	1	2, 3, 4	1	2	1	2	2		2	1	2	1	2	4	1	Hyogo
2	3	1	1, 3	2	2	1	2, 5	2		2	4		2	2	1	2	Hyogo
2	3	1	3, 4, 5	2	2	1	2, 7	2		1	1	3	3	3	1	1	Hyogo
2	3	1	1, 2, 3, 4, 5	2	1	1	2, 4	2		1, 2	1	2	2	2	1	1	Hyogo
2	3	1	1, 3	2	2	2		2		1, 2	1	1	1	2	1	4	Hyogo
2	3		3, 4	2	2	1	2, 7	1	2, 7	1	4		3	3	1	2	Hokkaido
2	3	1	1, 2, 3, 4, 5	2	2	1	1, 2	2		1	1	1	2	3	1	1	Hokkaido
2	3	1	1, 2, 3, 5	2	2	1	1, 2, 7	2		1	1	1	2	2	1	1	Hokkaido
2	3	2	7	2	2	1	2	2		1	4	1	2	2	3	2	Hokkaido
2	3	2	1, 3	2	2	1	2	2		1	1	1	2	3	1	2	Hokkaido
2	3	2	1, 2, 3, 4	1	2	1	2, 7	1		1	1, 5	1	3	3	1	1	Hokkaido
2	3	1	3, 4, 5	1	1	1	7	2		1	3	1	2	2	1	1	Hokkaido
2	3	2	3	2	2	2		2		1	1	1	2	3	1	1, 2	Hokkaido
2	3	1	1, 2, 3, 4, 5	2	2	2		2		1, 2, 3	1	1	2	2	1	1	Hokkaido
2	3	2	2, 3	2	2	2		2		1	3	2	2	2	3	2	Hokkaido
2	3	2	2, 3	2	2	2		2		1	1	1	3	3	1	1	Hokkaido
2	3	2	1, 3	2	2	2		2		2	4	1	2	2	3	4	Hokkaido
2	3	2	1, 2, 3, 4	2	2	1	4, 7	2		1, 2	1	2	3	3	1	1	Wakayama
2	3	1	1, 2, 3, 4, 5	2	2	1	1, 2	2		2	4	2	3	3	1	1	Wakayama
2	3	1	1, 2, 3	2	2	2		2		1, 2	5	1	2	2	1	1	Wakayama
2	3	1		2	2	2		2		5	1	1	2	2	1	4	Wakayama
2	3	1	3	2	2	2		2		5			3	3	4	4	Wakayama
2	3	1	2	2	2	1		1		2	1	2	3	3	1	2	Wakayama
2	3	1	1, 2, 3, 5	2	2	1	2	1	2	1, 2	1, 3	1	2	2	1	4
2	3	1	1, 2, 3, 4	1	1	1	2, 5	1	2	1	1	2	2	2	1	1, 2
2	3	1	2, 3	2	2	1	2, 7	1	2, 6, 7	2	1	1	3	2	1	1
2	3	1	1, 3, 5	2	2	2		1	7	1	1, 3	3	2	2	3
2	3	2	1, 2, 3, 4	1	1	1	2, 5	2		1, 2	1, 3	1	3	3	3	1
2	3	1	3	2	2	1	2, 7	2		1, 2	1, 4		2	2	1	1
2	3	1	1, 2, 3, 4, 5	2	2	2		2		1, 2	1	1	2	2	1	1
2	3	1	3, 5	2	2	2		2		1		1	2	2	1	1
2	2, 3	1	3, 4	2	2	1	2	1	4	1	1	2	2	2	1	1	Chiba
2	3	1	1, 2, 3	2	2	1	2, 6, 7	2	2, 7	1	1	1	2	3	1	1, 2	Shizuoka
2	3	1	1, 2, 3, 4, 5	2	2	1	2, 7	2		5	1, 5	3	2	2	1	1	Oita
2	2, 3	1	1, 2, 3, 4, 5	2	2	1	1, 2, 7	2		1	1	1	2	2	1	1	Tokushima
2	2, 3		3, 7	2	2	1		2		1	3		3	3	1	1, 2	Aomori
2	3	1	2, 3, 4, 5	2	2	1	2	2		1	1	1	2	2	3	1, 2	Hyogo
3	2	1	1, 3, 5		1	1	2	2		1, 2	1	2	3	3	1	2	Hyogo
2		1	1, 2, 3, 4, 5, 7	2	2	1	2	2		1	1	1	2	2	1	4	Okayama
2		1	1, 2, 3, 4, 5	2	2	1	2, 4, 5, 6	1	2	1, 2	1, 4, 5	2	1	1	1	2	Gunma
2		1	1, 3, 4, 5	1	1	1	1, 2, 6	2	2	1	1, 4	2	2	2	1	2	Hyogo
2		1	1, 2, 3	2	2	1	7	2		1	3	2	2	2	4	2	Hokkaido

## Sheet: codebook
Question	Code	Option
Q1	1	On-site night nurse present
Q1	2	On-call (telephone/external coverage)
Q1	3	Other (free text)
Q2	1	Full-time physician
Q2	2	Non–full-time (contract/visiting/locum, etc.)
Q2	3	Other (free text)
Q3	1	Yes
Q3	2	No
Q4	1	Oxygen therapy
Q4	2	Intravenous fluids/infusions
Q4	3	Oral medications
Q4	4	Enteral nutrition (nasogastric tube / gastrostomy)
Q4	5	End-of-life care (mitori)
Q4	6	None of the above were feasible
Q4	7	Other (free text)
Q5	1	Yes
Q5	2	No
Q6	1	Yes
Q6	2	No
Q7	1	Yes
Q7	2	No
Q8	1	We do not admit residents from long-term care facilities.
Q8	2	Beds are full; admission cannot be accepted.
Q8	3	Due to staff shortages, appropriate care for residents requiring caregiving support is difficult.
Q8	4	ICU or mechanical ventilation and other advanced care cannot be provided to LTCF residents.
Q8	5	DNAR or ACP (preference not to receive life-prolonging treatment) is a condition for admission.
Q8	6	Refused without a specific reason provided
Q8	7	Other (free text)
Q9	1	Yes
Q9	2	No
Q10	1	We do not admit residents from long-term care facilities.
Q10	2	Beds are full; admission cannot be accepted.
Q10	3	Due to staff shortages, appropriate care for residents requiring caregiving support is difficult.
Q10	4	ICU or mechanical ventilation and other advanced care cannot be provided to LTCF residents.
Q10	5	DNAR or ACP (preference not to receive life-prolonging treatment) is a condition for admission.
Q10	6	Refused without a specific reason provided
Q10	7	Other (free text)
Q11	1	The facility directly negotiated with hospitals/clinics to confirm visit/admission availability.
Q11	2	Public health offices or other government agencies coordinated visits/admissions.
Q11	3	Contracted/visiting physicians coordinated.
Q11	4	No particular coordination was performed.
Q11	5	Other (free text)
Q12	1	Managed by the facility’s full-time/contracted physician(s).
Q12	2	Managed by a visiting physician other than the facility’s full-time/contracted physician(s).
Q12	3	Telemedicine/remote consultation or instructions in collaboration with a medical institution.
Q12	4	No alternative measures; residents waited until clinical deterioration.
Q12	5	Other (free text)
Q12	6	Not applicable (admission was not difficult).
Q13	1	Similar acceptance as community-dwelling older adults (difficulty comparable).
Q13	2	Higher barrier to admission than for community-dwelling older adults.
Q13	3	Don’t know / Other (free text)
Q14	1	Yes
Q14	2	No
Q14	3	Unknown
Q15	1	Yes
Q15	2	No
Q15	3	Unknown
Q16	1	Directly confirmed with the resident.
Q16	2	Confirmed with family/agent rather than the resident.
Q16	3	Preferences were not confirmed; coordination followed hospital instructions or facility judgment.
Q16	4	Unknown
Q17	1	Many improved and recovered in the facility.
Q17	2	Many deteriorated in the facility and were eventually admitted.
Q17	3	Many deteriorated in the facility and died there.
Q17	4	Unknown / other.
