# Supplementary material for: Hospital Access Restrictions and Conditional Admission in Japanese Long-Term Care Facilities During COVID-19: A Nationwide Facility Survey of Outcomes
Source: Research Square preprint supplement (doi:10.21203/rs.3.rs-7824148/v1), 2025-11-20
Supplement: Supplementary file 2 [file 4721e5196194dbbd067d031e.docx]

**Survey Questionnaire**

Based on the English translation of the original Japanese instrument; options numbered for coding consistency with the dataset/codebook.

**Section 1. Facility Clinical Capability and Staffing**

**Q1. Night-time nursing coverage at your facility**

1) On-site night nurse present

2) On-call (telephone/external coverage)

3) Other (free text)

**Q2. Physician arrangement at your facility (select all that apply)**

1) Full-time physician

2) Non–full-time (contract/visiting/locum, etc.)

3) Other (free text)

**Q3. Before the pandemic (before February 2020), was end-of-life care feasible in your facility?**

1) Yes

2) No

**Q4. For residents with COVID-19, what medical care was feasible in-facility? (select all that apply)**

1) Oxygen therapy

2) Intravenous fluids/infusions

3) Oral medications

4) Enteral nutrition (nasogastric tube / gastrostomy)

5) End-of-life care

6) None of the above were feasible

7) Other (free text)

**Section 2. Access to Hospitals and Admission Restrictions**

**Q5. Were outpatient visits for your facility’s residents uniformly refused by hospitals/clinics?**

1) Yes

2) No

**Q6. Were outpatient visits for febrile residents uniformly refused by hospitals/clinics?**

1) Yes

2) No

**Q7. Due to (suspected) COVID-19, was hospital admission ever difficult to obtain?**

1) Yes

2) No

**Q8. If admission was refused or restricted (COVID-19), what reasons were given? (select all that apply)**

1) We do not admit residents from long-term care facilities.

2) Beds are full; admission cannot be accepted.

3) Due to staff shortages, appropriate care for residents requiring caregiving support is difficult.

4) ICU or mechanical ventilation and other advanced care cannot be provided to LTCF residents.

5) DNAR or ACP (preference not to receive life-prolonging treatment) is required as a condition for admission.

6) Refused without a specific reason provided

7) Other (free text)

**Q9. For conditions other than COVID-19 or fever (e.g., suspected stroke, fractures), was hospital admission ever difficult to obtain?**

1) Yes

2) No

**Q10. If admission was refused or restricted (non-COVID), what reasons were given? (select all that apply)**

1) We do not admit residents from long-term care facilities.

2) Beds are full; admission cannot be accepted.

3) Due to staff shortages, appropriate care for residents requiring caregiving support is difficult.

4) ICU or mechanical ventilation and other advanced care cannot be provided to LTCF residents.

5) DNAR or ACP (preference not to receive life-prolonging treatment) is required as a condition for admission.

6) Refused without a specific reason provided

7) Other (free text)

**Section 3. Coordination, Alternatives, and Comparative Perception**

**Q11. During the pandemic, how were outpatient/hospital admissions for febrile residents coordinated? (select all that apply)**

1) The facility directly negotiated with hospitals/clinics to confirm visit/admission availability.

2) Public health offices or other government agencies coordinated visits/admissions.

3) Contracted/visiting physicians coordinated.

4) No particular coordination was performed.

5) Other (free text)

**Q12. When a resident with COVID-19 could not be admitted, what alternative measures were taken? (select all that apply)**

1) Managed by the facility’s full-time/contracted physician(s).

2) Managed by a visiting physician other than the facility’s full-time/contracted physician(s).

3) Telemedicine/remote consultation or instructions in collaboration with a medical institution.

4) No alternative measures; residents waited until clinical deterioration.

5) Other (free text)

6) Not applicable (admission was not difficult).

**Q13. Compared with community-dwelling older adults in the same area, how did you perceive hospital admission acceptance for LTCF residents?**

1) Similar acceptance as community-dwelling older adults (difficulty comparable).

2) Higher barrier to admission than for community-dwelling older adults.

3) Don’t know / Other (free text)

**Section 4. Admission Conditions and Preference Confirmation**

**Q14. When residents with COVID-19 wished to be admitted, did your facility experience admissions being granted only on the condition of forgoing ICU-level treatments or mechanical ventilation, despite resident/family preference to receive such treatments?**

1) Yes

2) No

3) Unknown

**Q15. When residents with COVID-19 wished to be admitted, did your facility experience admissions being granted only on the condition of accepting DNAR (do-not-attempt-resuscitation), despite resident/family preference not to accept DNAR?**

1) Yes

2) No

3) Unknown

**Q16. During pandemic-related outpatient visits or hospital admissions, how were treatment preferences confirmed? (facility-level tendency; select all that apply)**

1) Directly confirmed with the resident.

2) Confirmed with family/agent rather than the resident.

3) Preferences were not confirmed; coordination followed hospital instructions or facility judgment.

4) Unknown

**Q17. Among residents for whom hospitalization was medically indicated and who wished to be admitted (resident or family), but could not be admitted at that time: what were the subsequent outcomes? (select all that apply)**

1) Many improved and recovered in the facility.

2) Many deteriorated in the facility and were eventually admitted.

3) Many deteriorated in the facility and died there.

4) Unknown / other.

**Section 5. Facility Location**

**Q18. Prefecture of your facility**

Please write the prefecture name (English): ___________________________

**Notes:**

• Terminology (DNR vs DNAR). The original Japanese instrument used “DNAR (do-not-attempt-resuscitation)”. Throughout the manuscript we use “DNR (do-not-resuscitate)” for consistency with international usage. Items Q8, Q10, and Q15 in this instrument retain “DNAR” to preserve the original wording. For coding and analysis, DNAR/DNR were treated as the same construct; free-text mentions were normalized accordingly (see Supplement 3 for the reclassification log).

• Skip logic from the original instrument applies (e.g., Q7 No → Q9; Q9 No → Q11).

• “Other (free text)” options are numbered here for codebook alignment; free-text content is handled separately in the dataset.
