# Supplementary material for: Hospital Access Restrictions and Conditional Admission in Japanese Long-Term Care Facilities During COVID-19: A Nationwide Facility Survey of Outcomes
Source: Research Square preprint supplement (doi:10.21203/rs.3.rs-7824148/v1), 2025-11-20
Supplement: Supplementary file 3 [file c42683ebb6d735c881d8a063.xlsx]

## Sheet: free_text_reclassification
Question	English	Code	Assigned label
Q1	Adjacent to a hospital.	2	On-call (telephone/external coverage)
Q1	Care workers/care managers consult by phone with a nurse and a physician to decide.	2	On-call (telephone/external coverage)
Q1	Consult nurses at the adjacent group hospital (under contract).	2	On-call (telephone/external coverage)
Q1	Contracted DoctorMate; nurse responds during emergency transport.	2	On-call (telephone/external coverage)
Q1	Emergency response.	2	On-call (telephone/external coverage)
Q1	Emergency treatment and ambulance transfer.	2	On-call (telephone/external coverage)
Q1	Handled by contracted physician.	2	On-call (telephone/external coverage)
Q1	Handled by the adjacent medical institution.	2	On-call (telephone/external coverage)
Q1	Head/assistant care managers receive the first report; nurse contacted as needed (first call to care manager).	2	On-call (telephone/external coverage)
Q1	Night-shift nurses of the affiliated hospital respond.	2	On-call (telephone/external coverage)
Q1	No nurses assigned; system in place to contact the attending physician.	2	On-call (telephone/external coverage)
Q1	Outsourced (external contractor).	2	On-call (telephone/external coverage)
Q1	Seek instructions by phone from the on-call physician.	2	On-call (telephone/external coverage)
Q1	Absent at night.	3	Other (free text)
Q1	Daytime only.	3	Other (free text)
Q1	None.	3	Other (free text)
Q1	Staffed only from 7:30 to 18:30 (daytime).	3	Other (free text)
Q2	Stationed/assigned physician on site.	1	Full-time physician
Q2	Stationed/assigned physician on site.	1	Full-time physician
Q2	Contracted arrangement.	2	Non–full-time (contract/visiting/locum, etc.)
Q2	First week of each month (scheduled visit).	2	Non–full-time (contract/visiting/locum, etc.)
Q2	Foundation’s chairman-physician comes promptly (on call).	2	Non–full-time (contract/visiting/locum, etc.)
Q2	Night-time DoctorMate service used.	2	Non–full-time (contract/visiting/locum, etc.)
Q2	Once per week (scheduled visiting).	2	Non–full-time (contract/visiting/locum, etc.)
Q2	Physician from an affiliated/partner medical institution.	2	Non–full-time (contract/visiting/locum, etc.)
Q2	Three times per week, 2 hours each (scheduled visiting).	2	Non–full-time (contract/visiting/locum, etc.)
Q2	Weekly rounding; otherwise by phone.	2	Non–full-time (contract/visiting/locum, etc.)
Q2	No specific placement standard.	3	Other (free text)
Q4	According to physician’s and family’s preferences.	7	Other (free text)
Q4	Admission for only those with worse symptoms per physician judgment.	7	Other (free text)
Q4	Consultation/treatment at partner hospital (out-of-facility).	7	Other (free text)
Q4	Cooling.	7	Other (free text)
Q4	Emergency transport by ambulance.	7	Other (free text)
Q4	Going to hospital for consultation/visit (out-of-facility).	7	Other (free text)
Q4	Hospital admission / transfer (out-of-facility).	7	Other (free text)
Q4	Hospital admission / transfer (out-of-facility).	7	Other (free text)
Q4	Hospital admission / transfer (out-of-facility).	7	Other (free text)
Q4	Hospital admission / transfer (out-of-facility).	7	Other (free text)
Q4	Hospital admission / transfer (out-of-facility).	7	Other (free text)
Q4	Hospital admission / transfer (out-of-facility).	7	Other (free text)
Q4	Insulin.	7	Other (free text)
Q4	Maximal in-facility infection prevention; achieved zero cases (staff/family burden).	7	Other (free text)
Q4	No residents with infection until Aug, FY2023.	7	Other (free text)
Q4	Primarily admission under contracted physician/corporate instruction (out-of-facility).	7	Other (free text)
Q4	Primarily admission; above refers to cases not admitted.	7	Other (free text)
Q4	Regular vital checks; called partner hospital for instructions; informed EMS at night; performed suction.	7	Other (free text)
Q4	Sputum suction.	7	Other (free text)
Q8	Asked that the resident be managed at the facility.	1	We do not admit residents from long-term care facilities.
Q8	Because it is a long-term care facility, please manage on site.	1	We do not admit residents from long-term care facilities.
Q8	End-of-life care in the facility was recommended.	1	We do not admit residents from long-term care facilities.
Q8	If feasible, please manage in the facility.	1	We do not admit residents from long-term care facilities.
Q8	Requested facility-based management depending on symptoms.	1	We do not admit residents from long-term care facilities.
Q8	Because aggressive testing/treatment for older adults could not be provided.	4	ICU or mechanical ventilation and other advanced care cannot be provided to LTCF residents.
Q8	Told to try another hospital.	6	Refused without a specific reason provided
Q8	All residents with dementia who could not be isolated were refused.	7	Other (free text)
Q8	Because in-hospital transmission would be problematic.	7	Other (free text)
Q8	Because oral antivirals were available, we intentionally managed in-facility when pneumonia/worsening was absent.	7	Other (free text)
Q8	Could not be seen because another building on the same premises had COVID-19 cases.	7	Other (free text)
Q8	Explained that suspected infectious cases could not be admitted.	7	Other (free text)
Q8	Family strongly requested admission; we were told fever alone in older adults did not meet the admission threshold.	7	Other (free text)
Q8	In Hiroshima, admissions were controlled by the public health office; no admission guidance was given.	7	Other (free text)
Q8	In a stage not requiring medical treatment; nothing to do.	7	Other (free text)
Q8	In some cases, our unit/private rooms allowed in-facility management; the resident recovered.	7	Other (free text)
Q8	It was judged that COVID-19 patients could not be accepted.	7	Other (free text)
Q8	Long wait for admission request during public-health triage; some deteriorated.	7	Other (free text)
Q8	Milder than other patients; SpO2 around 90%; fever only with mild dyspnea.	7	Other (free text)
Q8	Oftentimes, the decision was made based on severity.	7	Other (free text)
Q8	Partner hospital could not admit; we managed in the facility; we did not request other hospitals.	7	Other (free text)
Q8	Requested facility-based management because the case was mild.	7	Other (free text)
Q8	Residents who could not rest due to dementia were refused.	7	Other (free text)
Q8	Told the case was not an admission candidate because of mild illness.	7	Other (free text)
Q8	Told to follow the public-health office’s instruction to identify the admitting hospital if admission was needed.	7	Other (free text)
Q8	Unless severe, it was generally considered to be managed within the facility.	7	Other (free text)
Q8	“Because of COVID-19” (stated as the reason).	7	Other (free text)
Q10	Instructed that mild infections should be managed in the facility.	1	We do not admit residents from long-term care facilities.
Q10	They did not understand the medical system of a special nursing home; told to manage under instructions from the contracted physician.	1	We do not admit residents from long-term care facilities.
Q10	Because there were COVID-19 patients, single rooms were required but none were available.	2	Beds are full; admission cannot be accepted.
Q10	Hospital physician shortage.	3	Due to staff shortages, appropriate care for residents requiring caregiving support is difficult.
Q10	Recommended transfer because surgery cannot be performed here.	4	ICU or mechanical ventilation and other advanced care cannot be provided to LTCF residents.
Q10	Told it was outside the specialty—even by an affiliated hospital.	4	ICU or mechanical ventilation and other advanced care cannot be provided to LTCF residents.
Q10	Oftentimes we were told that 'it is difficult to respond.'	6	Refused without a specific reason provided
Q10	Emergency department would accept only if a family member and facility staff (who know the resident’s baseline) accompanied in the ambulance (pre-admission stage).	7	Other (free text)
Q10	Enteral tube feeding (noted as an issue).	7	Other (free text)
Q10	For severe dementia, the facility judged admission inappropriate; with family consent, care was provided in the facility (fall during isolation → orthopedics five days later; dislocation; immobilization per physician).	7	Other (free text)
Q10	Outpatient visit was refused when a resident on another floor developed COVID-19.	7	Other (free text)
Q10	Same as responses to Q8.	7	Other (free text)
Q10	Stated they could not handle dementia symptoms; said it would disturb other patients.	7	Other (free text)
Q10	When refusal of caregiving/nursing/medical procedures was anticipated for residents with dementia, admission was often denied (though not explicitly stated).	7	Other (free text)
Q11	Ambulance transport when oxygen saturation dropped.	1	The facility directly negotiated with hospitals/clinics to confirm visit/admission availability.
Q11	Full-time physician responded.	1	The facility directly negotiated with hospitals/clinics to confirm visit/admission availability.
Q11	Monthly coordination meeting with partner hospital; reported by phone and discussed case-by-case.	1	The facility directly negotiated with hospitals/clinics to confirm visit/admission availability.
Q11	Performed antigen testing and arranged a consultation.	1	The facility directly negotiated with hospitals/clinics to confirm visit/admission availability.
Q11	Ambulance (fire department EMS) coordinated.	2	Public health offices or other government agencies coordinated visits/admissions.
Q11	Ambulance transport due to low SpO2; waited 1–2 hours because no hospital could accept.	2	Public health offices or other government agencies coordinated visits/admissions.
Q11	By EMS.	2	Public health offices or other government agencies coordinated visits/admissions.
Q11	Called ambulance; EMS searched for accepting facilities.	2	Public health offices or other government agencies coordinated visits/admissions.
Q11	Coordination by EMS personnel.	2	Public health offices or other government agencies coordinated visits/admissions.
Q11	EMS coordinated hospital acceptance during transport.	2	Public health offices or other government agencies coordinated visits/admissions.
Q11	EMS performed the coordination.	2	Public health offices or other government agencies coordinated visits/admissions.
Q11	EMS personnel performed coordination.	2	Public health offices or other government agencies coordinated visits/admissions.
Q11	Emergency response via 119.	2	Public health offices or other government agencies coordinated visits/admissions.
Q11	Handled by ambulance service.	2	Public health offices or other government agencies coordinated visits/admissions.
Q11	Hospitalized in Aug FY2023; ~4 hours waiting in the ambulance.	2	Public health offices or other government agencies coordinated visits/admissions.
Q11	Requested ambulance; EMS coordinated based on condition.	2	Public health offices or other government agencies coordinated visits/admissions.
Q11	Requested ambulance; EMS searched for destination hospital.	2	Public health offices or other government agencies coordinated visits/admissions.
Q11	When ambulance was requested, EMS searched for destination.	2	Public health offices or other government agencies coordinated visits/admissions.
Q11	Managed in the facility.	4	No particular coordination was performed.
Q11	No COVID-19 cases during the pandemic.	4	No particular coordination was performed.
Q11	No eligible cases during the pandemic.	4	No particular coordination was performed.
Q12	Designated an infection-control nurse and responded.	1	Managed by the facility’s full-time/contracted physician (in-facility observation/treatment; e.g., oxygen/IVs/oral meds).
Q12	Explained that PHO/hospital advised no admission regardless of prognosis; obtained agreement to manage in-facility.	1	Managed by the facility’s full-time/contracted physician (in-facility observation/treatment; e.g., oxygen/IVs/oral meds).
Q12	Initially judged manageable without admission, but admitted due to worsening.	1	Managed by the facility’s full-time/contracted physician (in-facility observation/treatment; e.g., oxygen/IVs/oral meds).
Q12	Managed within the facility.	1	Managed by the facility’s full-time/contracted physician (in-facility observation/treatment; e.g., oxygen/IVs/oral meds).
Q12	Partner-hospital physician rounded Wed/Fri; consulted PHO by phone for instructions.	1	Managed by the facility’s full-time/contracted physician (in-facility observation/treatment; e.g., oxygen/IVs/oral meds).
Q12	Provided IV infusions in the facility.	1	Managed by the facility’s full-time/contracted physician (in-facility observation/treatment; e.g., oxygen/IVs/oral meds).
Q12	Public health office provided support (e.g., loaning oxygen).	1	Managed by the facility’s full-time/contracted physician (in-facility observation/treatment; e.g., oxygen/IVs/oral meds).
Q12	Requested a home visit by Fast Doctor.	2	Managed by a visiting physician other than the contracted physician (e.g., home-visit care).
Q12	Consulted partner-hospital physician; facility director (NS) coordinated.	3	Telemedicine/remote consultation or instructions provided.
Q12	Per PHO instruction, admitted when condition worsened (e.g., oxygen saturation fell).	3	Telemedicine/remote consultation or instructions provided.
Q12	Could not be admitted because the case did not worsen; waited for recovery.	4	No alternative measures; residents waited until admission became possible.
Q12	Prefectural government coordinated.	5	Other (free text)
Q12	Transferred by ambulance to an open hospital in another prefecture.	5	Other (free text)
Q12	Could be admitted at several hospitals.	6	Not applicable (admission was not difficult).
Q12	Did not progress to severe disease requiring admission.	6	Not applicable (admission was not difficult).
Q12	Did not progress to the level requiring admission.	6	Not applicable (admission was not difficult).
Q12	Few required admission (mild); improved with in-facility care.	6	Not applicable (admission was not difficult).
Q12	Improved with antipyretics, so admission coordination was not needed.	6	Not applicable (admission was not difficult).
Q12	No COVID-19 cases during the pandemic.	6	Not applicable (admission was not difficult).
Q12	No cases progressed to admission.	6	Not applicable (admission was not difficult).
Q13	During the pandemic, beds were simply unavailable; both community-dwelling older adults and LTCF residents had difficulty being admitted.	1	Similar acceptance as community-dwelling older adults.
Q13	Because facilities have physicians to contact and nurses on site, hospitals considered facilities more capable than home settings.	2	Higher barrier to admission than for community-dwelling older adults.
Q13	Admission was easier only for COVID-19; for non-COVID conditions many hospitals said beds were for COVID and could not accept.	3	Don’t know / Other (free text)
Q13	Because it was an infectious disease, if symptoms were stable, I thought it was unavoidable to manage in the facility.	3	Don’t know / Other (free text)
Q13	Before reclassification to Class 5, admission did not feel like an option.	3	Don’t know / Other (free text)
Q13	I heard about hospitals being full, but I did not feel a direct impact.	3	Don’t know / Other (free text)
Q13	It felt that the admission barrier was low.	3	Don’t know / Other (free text)
Q13	It was due to regional bed shortages rather than age per se; compared with home, facilities … (incomplete).	3	Don’t know / Other (free text)
Q13	No comparator available.	3	Don’t know / Other (free text)
Q13	Told to manage within the facility; there was no choice.	3	Don’t know / Other (free text)
Q13	We could manage in the facility and had no residents who needed admission.	3	Don’t know / Other (free text)
Q17	In a ward cluster (58/60 infected), many recovered but more than 10 died.	3	Many deteriorated in the facility and died there.
Q17	A non-partner hospital accepted admission.	4	Unknown / other.
Q17	If admission was not possible, physician explained and family agreed to return to facility; hospitals might consider if strongly requested.	4	Unknown / other.
Q17	In general, everyone who needed admission could be admitted.	4	Unknown / other.
Q17	Later admitted to hospital.	4	Unknown / other.
Q17	Later admitted to hospital.	4	Unknown / other.
Q17	No cases requiring (home) visits.	4	Unknown / other.
Q17	No cases where admission was not possible.	4	Unknown / other.
Q17	No residents/families wished admission.	4	Unknown / other.
Q17	No such cases.	4	Unknown / other.
Q17	Not applicable.	4	Unknown / other.
Q17	Only three residents required admission; the others recovered.	4	Unknown / other.
Q17	Same as Q12.	4	Unknown / other.
Q17	There were no such residents.	4	Unknown / other.
Q17	Was able to be admitted.	4	Unknown / other.

## Sheet: codebook
Question	Code	Option
Q1	1	On-site night nurse present
Q1	2	On-call (telephone/external coverage)
Q1	3	Other (free text)
Q2	1	Full-time physician
Q2	2	Non–full-time (contract/visiting/locum, etc.)
Q2	3	Other (free text)
Q3	1	Yes
Q3	2	No
Q4	1	Oxygen therapy
Q4	2	Intravenous fluids/infusions
Q4	3	Oral medications
Q4	4	Enteral nutrition (nasogastric tube / gastrostomy)
Q4	5	End-of-life care (mitori)
Q4	6	None of the above were feasible
Q4	7	Other (free text)
Q5	1	Yes
Q5	2	No
Q6	1	Yes
Q6	2	No
Q7	1	Yes
Q7	2	No
Q8	1	We do not admit residents from long-term care facilities.
Q8	2	Beds are full; admission cannot be accepted.
Q8	3	Due to staff shortages, appropriate care for residents requiring caregiving support is difficult.
Q8	4	ICU or mechanical ventilation and other advanced care cannot be provided to LTCF residents.
Q8	5	DNAR or ACP (preference not to receive life-prolonging treatment) is a condition for admission.
Q8	6	Refused without a specific reason provided
Q8	7	Other (free text)
Q9	1	Yes
Q9	2	No
Q10	1	We do not admit residents from long-term care facilities.
Q10	2	Beds are full; admission cannot be accepted.
Q10	3	Due to staff shortages, appropriate care for residents requiring caregiving support is difficult.
Q10	4	ICU or mechanical ventilation and other advanced care cannot be provided to LTCF residents.
Q10	5	DNAR or ACP (preference not to receive life-prolonging treatment) is a condition for admission.
Q10	6	Refused without a specific reason provided
Q10	7	Other (free text)
Q11	1	The facility directly negotiated with hospitals/clinics to confirm visit/admission availability.
Q11	2	Public health offices or other government agencies coordinated visits/admissions.
Q11	3	Contracted/visiting physicians coordinated.
Q11	4	No particular coordination was performed.
Q11	5	Other (free text)
Q12	1	Managed by the facility’s full-time/contracted physician(s).
Q12	2	Managed by a visiting physician other than the facility’s full-time/contracted physician(s).
Q12	3	Telemedicine/remote consultation or instructions in collaboration with a medical institution.
Q12	4	No alternative measures; residents waited until clinical deterioration.
Q12	5	Other (free text)
Q12	6	Not applicable (admission was not difficult).
Q13	1	Similar acceptance as community-dwelling older adults (difficulty comparable).
Q13	2	Higher barrier to admission than for community-dwelling older adults.
Q13	3	Don’t know / Other (free text)
Q14	1	Yes
Q14	2	No
Q14	3	Unknown
Q15	1	Yes
Q15	2	No
Q15	3	Unknown
Q16	1	Directly confirmed with the resident.
Q16	2	Confirmed with family/agent rather than the resident.
Q16	3	Preferences were not confirmed; coordination followed hospital instructions or facility judgment.
Q16	4	Unknown
Q17	1	Many improved and recovered in the facility.
Q17	2	Many deteriorated in the facility and were eventually admitted.
Q17	3	Many deteriorated in the facility and died there.
Q17	4	Unknown / other.
